# Supplementary material for: Impact of bronchodilator responsiveness on lung age: implications for clinical practice from a cross-sectional study
Source: Research Square preprint supplement (doi:10.21203/rs.3.rs-6943087/v1), 2025-07-14
Supplement: Supplementary file 1 [file e64e95bf13ebcbbb91b75d59.docx]

**ADDITIONAL FILE**

1.

Changes in lung age and pulmonary function parameters before and after bronchodilators responsiveness.

| **Variables** | **Lung age** | **FEV1** | **FVC** | **FEF50%** | **FEF75%** |
| --- | --- | --- | --- | --- | --- |
| **Pre-BDR** | 88.69±26.13 | 1.75±0.77 | 2.86±0.85 | 1.47±1.23 | 0.43±0.42 |
| **Post-BDR** | 83.92±26.26 | 1.88±0.78 | 2.98±0.85 | 1.78±1.39 | 0.57±0.51 |
| **Difference** | 4.77±6.57 | 0.13±0.19 | 0.12±0.23 | 0.32±0.41 | 0.13±0.19 |
| **P value** | <0.001 | <0.001 | <0.001 | <0.001 | <0.001 |

BDR: bronchodilators responsiveness

2.

|  |  | **Pre-LA** | | | **Total** |
| --- | --- | --- | --- | --- | --- |
|  |  | **Normal** | **Normal increased** | **Abnormally increased** |
| **Post-LA** | **Normal** | 736 (96.8%) | 178 (34.03%) | 116 (1.88%) | 1030 |
| **Normal increased** | 12 (1.60%) | 329 (62.91) | 254 (4.12%) | 595 |
| **Abnormally increased** | 12 (1.60%) | 16 (3.06%) | 5799(94.00%) | 5827 |
|  | **Total** | 760 | 523 | 6169 | 7452 |

The McNemar-Bowker Test for Symmetry was used to analyze the changes in lung age classification before and after bronchodilators responsiveness test. The results showed: χ²=386.37, df=2, P<0.001.

3.

Weighted Kappa Consistency Test.

|  | **value** | **ASE** | **z** | **Pr(>|z|)** |
| --- | --- | --- | --- | --- |
| Unweighted | 0.7630 | 0.008728 | 87.43 | <0.001 |
| Weighted | 0.8575 | 0.007167 | 119.65 | <0.001 |

4.

Demographic information, spirometry, and lung age data for patients with and without lung age improvement after bronchodilators responsiveness test.

|  | **No improvement(n=**6904) | **Improved(n=**548) | **P value** |
| --- | --- | --- | --- |
| n |  |  |  |
| Sex(%) | 4879(70.7%) | 317(57.8%) | <0.001 |
| Male |  |  |  |
| Female | 2025(29.3%) | 231(42.2%) |  |
| Age | 58.83(12.71) | 53.77(13.40) | <0.001 |
| BMI | 23.03(2.89) | 23.86(2.68) | <0.001 |
| Weight | 61.62(10.15) | 63.90(10.22) | <0.001 |
| Height | 1.63(0.08) | 1.63(0.08) | 0.893 |
| Pre-FEV1 | 1.70(0.76) | 2.42(0.60) | <0.001 |
| Pre-FVC | 2.81(0.84) | 3.37(0.78) | <0.001 |
| Pre-FEF50% | 1.40(1.21) | 2.37(1.10) | <0.001 |
| Pre-FEF75% | 0.41(0.41) | 0.69(0.44) | <0.001 |
| Pre-LA | 90.70(25.77) | 63.31(14.94) | <0.001 |
| Post-FEV1 | 1.82(0.76) | 2.69(0.55) | <0.001 |
| Post-FVC | 2.93(0.84) | 3.52(0.75) | <0.001 |
| Post-FEF50% | 1.68(1.36) | 3.07(1.14) | <0.001 |
| Post-FEF75% | 0.53(0.49) | 1.02(0.57) | <0.001 |
| Post-LA | 86.29(25.65) | 54.13(11.56) | <0.001 |

Model Performance, Validation Results, and Feature Importance.

| Category | Variables | Value |
| --- | --- | --- |
| Model performance | overall out-of-bag error rate | 6.92% |
|  | Accuracy for Class 0 (No Improvement) | 99.55% |
|  | Accuracy for Class 1 (Improvement) | 11.5% |
| Validation Set | Accuracy | 92.6% |
|  | Precision (Predicted as 1) | 68.2% |
|  | Recall (True as 1) | 10.3% |
|  | F1 Score | 17.6% |
| Feature Importance | Pre-LA | MeanDecreaseGini = 213.07 |
|  | Age | MeanDecreaseGini = 123.22 |
|  | Pre-FEF50 | MeanDecreaseGini = 129.18 |
|  | Pre-FVC | MeanDecreaseGini = 117.10 |
|  | Height | MeanDecreaseGini = 103.48 |
|  | Weight | MeanDecreaseGini = 101.59 |
|  | BMI | MeanDecreaseGini = 106.59 |

6.

Receiver operating characteristic (ROC) curve analysis was employed to evaluate the predictive ability of pre-BDR parameters for post-BDR FEV1/FVC < 0.7

|  | **Pre-BDR** | | | | | | **Post-BDR** | | | | | |
| --- | --- | --- | --- | --- | --- | --- | --- | --- | --- | --- | --- | --- |
|  | Pre-FEV1/FVC | Pre-FEV1 | Pre-FVC | Pre-FEF50% | Pre-FEF75% | ULNLA | Pre-FEV1/FVC | Pre-FEV1 | Pre-FVC | Pre-FEF50% | Pre-FEF75% | ULNLA |
| **cutoff** | 78.15 | 64.08 | 88.45 | 32.75 | 24.34 | -19.6 | / | / | / | / | / | / |
| **AUC** | 0.984 | 0.867 | 0.597 | 0.953 | 0.923 | 0.865 | 0.984 | 0.847 | 0.597 | 0.953 | 0.910 | 0.844 |
| **AUC**  **95% CI** | 0.982-0.984 | 0.859-0.867 | 0.57–0.597 | 0.955-0.959 | 0.917-0.923 | 0.856-0.865 | 0.982-0.987 | 0.830-0.865 | 0.570-0.624 | 0.945-0.961 | 0.896-0.924 | 0.826-0.861 |
